# Supplementary material
Source: Frontiers journal article supplement (https://www.frontiersin.org/articles/344767)
Supplement: Data_Sheet_1.pdf [file Data_Sheet_1.pdf]

## *Supplementary Material*

# **Construction and validation of subject-specific biventricular finite-element models of healthy and failing swine hearts from high-resolution DT-MRI**

**Kevin L. Sack<sup>1,2</sup>, Eric Aliotta<sup>3</sup>, Daniel B. Ennis<sup>3</sup>, Jenny S. Choy<sup>4</sup>, Ghassan S. Kassab<sup>4</sup>, Julius M. Guccione<sup>2\*</sup>, Thomas Franz<sup>1,5</sup>**

<sup>1</sup> Division of Biomedical Engineering, Department of Human Biology, University of Cape Town, Cape Town, South Africa

<sup>2</sup> Department of Surgery, University of California at San Francisco, San Francisco, California, USA

<sup>3</sup> Department of Radiological Sciences, University of California, Los Angeles, California, USA

<sup>4</sup> California Medical Innovations Institute, Inc., San Diego, California, USA

<sup>5</sup> Bioengineering Science Research Group, Engineering Sciences, Faculty of Engineering and the Environment, University of Southampton, Southampton, UK

### **\* Correspondence:**

Julius M Guccione

Email: Julius.Guccione@ucsf.edu

Phone: 415 680 6285

Fax: 415 750 2181

## **1 Supplementary Figures and Tables**

**Table S1: In vivo volume and pressure target values used in the model creation. Abbreviations: EDV: End diastolic volume; SV: Stroke volume; EDP: End diastolic pressure; ESP: End systolic pressure. \* Mean value from full data set of larger group (n = 5) at healthy baseline.**

| Measurement         | Healthy Subject | HF Subject | Source                                  |
|---------------------|-----------------|------------|-----------------------------------------|
| LV EDV (ml)         | 57.8            | 103.0      | <i>in vivo</i> echocardiogram           |
| LV SV (ml)          | 30.9            | 33.0       | <i>in vivo</i> echocardiogram           |
| LV EDP (mmHg)       | 13.5 *          | 29.6       | <i>in vivo</i> pressure catheterization |
| LV ESP (mmHg)       | 87.6 *          | 130        | <i>in vivo</i> pressure catheterization |
| Min aortic pressure | 60.6 *          | 90         | <i>in vivo</i> pressure catheterization |

**Table S2: Constitutive parameters for the passive material response.**

| Passive Parameters   | Description                                                                              |
|----------------------|------------------------------------------------------------------------------------------|
| $a, b$               | Governs the isotropic response of the tissue                                             |
| $a_f, b_f$           | Governs additional stiffness in the fibre direction                                      |
| $a_s, b_s$           | Governs additional stiffness in the sheet direction                                      |
| $a_{fs}, b_{fs}$     | Governs coupling stiffness in the fibre and sheet directions                             |
| $I_1$                | The first isochoric strain invariant                                                     |
| $I_{4i}$             | A pseudo-invariant defined as $\mathbf{A}_i \cdot \tilde{\mathbf{C}} \cdot \mathbf{A}_i$ |
| $I_{8fs}$            | A pseudo-invariant defined as $\mathbf{A}_f \cdot \tilde{\mathbf{C}} \cdot \mathbf{A}_s$ |
| $\tilde{\mathbf{C}}$ | The isochoric Right Cauchy-Green tensor ( $\tilde{\mathbf{C}} = J^{-2/3} \mathbf{C}$ )   |
| $\mathbf{A}_i$       | Vector in direction $i$                                                                  |
| $D$                  | Multiple of Bulk modulus ( $K = 2/D$ )                                                   |
| $J$                  | The third deformation gradient invariant ( $J = \det \mathbf{F}$ )                       |
| Active Parameters    | Description                                                                              |
| $t_0$                | Time to reach peak tension after the initiation of active tension                        |
| $m$                  | Governs the slope of the relaxation                                                      |
| $b$                  | Governs the length of relaxation                                                         |
| $l_0$                | The sarcomere length below which no active force develops                                |
| $B$                  | Governs the shape of the peak isometric tension-sarcomere length relation                |
| $Ca_0$               | The peak intercellular calcium concentration                                             |
| $Ca_{0max}$          | The maximum intercellular calcium concentration                                          |
| $T_{max}$            | The maximum active tension able to develop                                               |
| $l_r$                | The initial sarcomere length                                                             |
| $E_{ff}$             | Green strain in the fiber direction                                                      |

**Table S3: Control values for the lumped circulatory flow model and literature values for comparison.**

| Variable  | Units                   | Both subjects | Literature        |
|-----------|-------------------------|---------------|-------------------|
| $R_M$     | mmHg s ml <sup>-1</sup> | 0.03          | 0.0 - 0.20 [1-3]  |
| $R_A$     | mmHg s ml <sup>-1</sup> | 0.03          | 0.0 - 0.20 [1-3]  |
| $R_{SYS}$ | mmHg s ml <sup>-1</sup> | 1.70          | 1.05 - 4.00 [1-3] |
| $R_P$     | mmHg s ml <sup>-1</sup> | 0.03          | 0.0 - 0.06 [1-3]  |
| $R_T$     | mmHg s ml <sup>-1</sup> | 0.03          | 0.0 - 0.02 [1-3]  |
| $C_P$     | ml mmHg <sup>-1</sup>   | 4.43          | 1.0 - 7.0 [2-4]   |
| $C_{SA}$  | ml mmHg <sup>-1</sup>   | 0.80          | 0.3 – 2.1 [2-4]   |
| $C_{SV}$  | ml mmHg <sup>-1</sup>   | 16.6          | 6.0 - 17.0 [2, 3] |

**Table S4: Initial pressure state of the compliance vessels in the subject-specific model.**

| Cavity          | Units | Healthy subject | HF subject | Motivation                                           |
|-----------------|-------|-----------------|------------|------------------------------------------------------|
| C <sub>p</sub>  | mmHg  | 15              | 35         | Needed to ensure LV fills to correct pressure        |
| C <sub>SA</sub> | mmHg  | 65              | 90         | Needed to ensure ejection begins at correct pressure |
| C <sub>SV</sub> | mmHg  | 4               | 8          | Needed to ensure RV fills to correct pressure        |
| LV              | mmHg  | 13.5            | 29.6       | Determined from <i>in vivo</i> data                  |
| RV              | mmHg  | 4               | 8          | Based on literature: 1-7mmHg [5] $3.9 \pm 1.6$ [6]   |

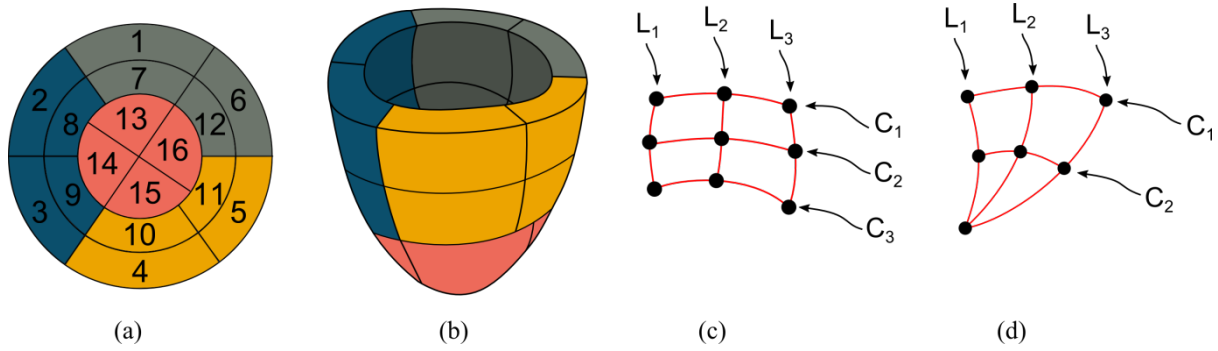

**Figure S1: The 16 LV segment breakdown used in the in vivo strain calculation illustrated on (a): a radial map and (b): a simplified LV model. (c): A quadrilateral surface segment defined by 9 nodes. Nodes are joined by 3 circumferential cubic splines,  $C_i$ , and 3 longitudinal cubic splines,  $L_i$ . (d): A triangular surface segment defined by 7 nodes. Nodes are joined by 2 circumferential cubic splines,  $C_i$ , and 3 longitudinal cubic splines,  $L_i$ .**

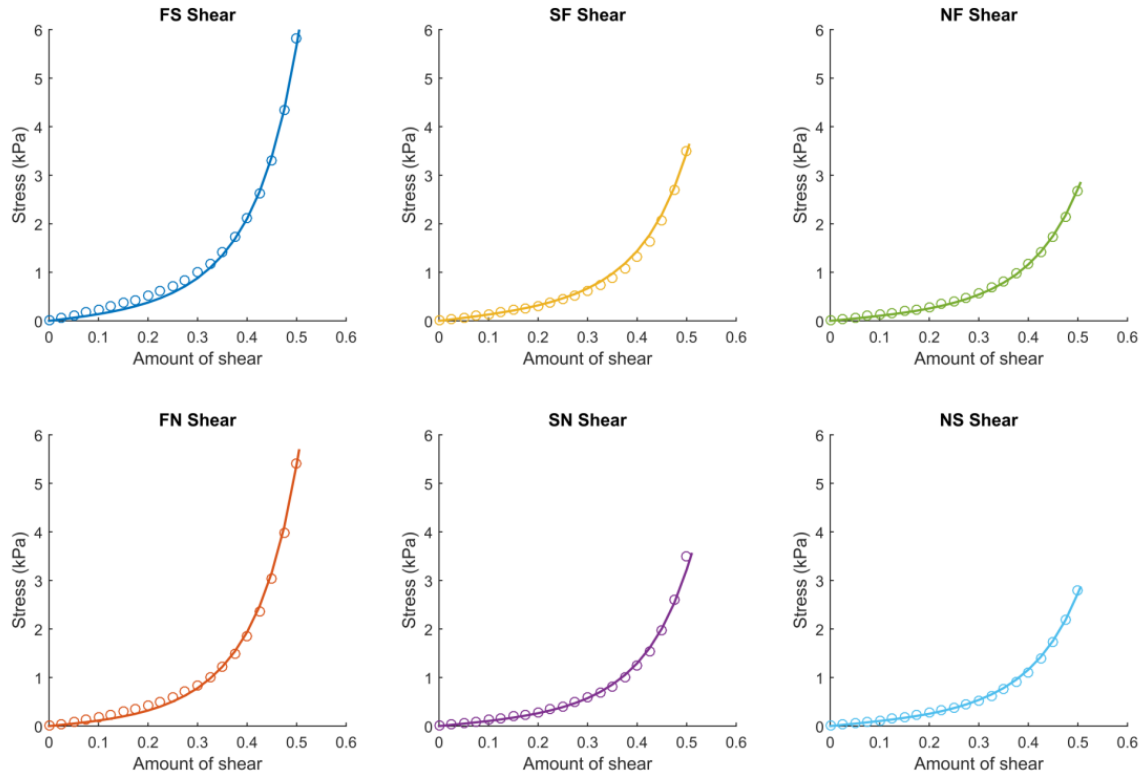

**Figure S2: Passive material response of all 6 shear modes of an idealized tissue cube. FE model response given by solid lines and experimental data presented as circles.**

## 2 Additional details for active contraction

The full description of active tension is described by

$$T_a(t, l) = T_{MAX} \frac{Ca_0^2}{Ca_0^2 + ECa_{50}^2(l)} \frac{[1 - \cos(\omega(\text{mod}(t), l))]}{2} h \quad (S1)$$

where

$$ECa_{50}(l) = \frac{Ca_{0max}}{\sqrt{e^{B(l-l_0)} - 1}}, \quad (S2)$$

Due to the cyclic nature of the cardiac cycle, the modulus function acting on time is enforced to wrap the time variable around after each cardiac. This enforces  $0 \leq \text{mod}(t) \leq HR/60$ . Where HR is the heart rate. In our case HR is chosen as 77 Bpm for both subjects.

$$\omega(\text{mod}(t), l) = \begin{cases} \pi \frac{\text{mod}(t)}{t_0}, & \text{when } 0 \leq \text{mod}(t) \leq t_0 \\ \pi \frac{\text{mod}(t) - t_0 + t_r(l)}{t_r}, & \text{when } t_0 \leq \text{mod}(t) \leq t_0 + t_r(l) \\ 0, & \text{when } \text{mod}(t) \geq t_0 + t_r(l) \end{cases} \quad (S3)$$

$$t_r(l) = ml + b, \quad (S4)$$

$$l = l_r \sqrt{2E_{ff} + 1}, \quad (S5)$$

with parameters definitions provided in Supplementary Table1 and baseline values taken from [7]. This mathematical description of active tension ensures a smooth yet steep transition from zero tension at the start of systole to peak active tension,  $T_{MAX}$ , at time  $t_0$  and then a smooth decline back to zero for the specified relaxation time  $t_r$ .

### Supplementary references

1. Hoppensteadt, F.C. and C.S. Peskin, *Mathematics in medicine and the life sciences*. 1992, New York, NY: Springer-Verlag.
2. Pilla, J.J., J.H. Gorman III, and R.C. Gorman, *Theoretic Impact of Infarct Compliance on Left Ventricular Function*. *Annals of Thoracic Surgery*, 2009. **87**(3): p. 803-810.
3. Santamore, W.P. and D. Burkhoff, *Hemodynamic consequences of ventricular interaction as assessed by model analysis*. *American Journal of Physiology-Heart and Circulatory Physiology*, 1991. **260**(1): p. H146-H157.
4. Watanabe, H., et al., *Multiphysics simulation of left ventricular filling dynamics using fluid-structure interaction finite element method*. *Biophysical journal*, 2004. **87**(3): p. 2074-2085.

5. Mann, D.L., et al., *Braunwald's heart disease*. 2015, Philadelphia, PA: Elsevier-Saunders.
6. Quinn, T.A., et al., *Effects of sequential biventricular pacing during acute right ventricular pressure overload*. American Journal of Physiology-Heart and Circulatory Physiology, 2006. **60**(5): p. H2380.
7. Walker, J.C., et al., *MRI-based finite-element analysis of left ventricular aneurysm*. American Journal of Physiology-Heart and Circulatory Physiology, 2005. **289**(2): p. H692-H700.
